# Supplementary material for: Clinical benefit of remdesivir in rhesus macaques infected with SARS-CoV-2
Source: PubMed Central journal article supplement (PMC7239049; doi:10.1101/2020.04.15.043166), 2020-04-22
Supplement: media-1.pdf [file media-1.pdf]

## Supplementary materials

### Clinical benefit of remdesivir in rhesus macaques infected with SARS-CoV-2

Brandi N. Williamson<sup>1</sup>, MPH; Friederike Feldmann<sup>2</sup>, AS; Benjamin Schwarz<sup>3</sup>, PhD; Kimberly Meade-White<sup>1</sup>, MSc; Danielle P. Porter<sup>5</sup>, PhD; Jonathan Schulz<sup>1</sup>, BSc; Neeltje van Doremalen<sup>1</sup>, PhD; Ian Leighton, BA<sup>3</sup>; Claude Kwe Yinda<sup>1</sup>, PhD; Lizzette Pérez-Pérez<sup>1</sup>, MSc; Atsushi Okumura<sup>1</sup>, DVM; Jamie Lovaglio<sup>2</sup>, DVM; Patrick W. Hanley<sup>2</sup>, DVM; Greg Saturday<sup>2</sup>, DVM; Catharine M. Bosio<sup>3</sup>, PhD; Sarah Anzick<sup>4</sup>, PhD; Kent Barbian<sup>4</sup>, MSc; Tomas Cihlar<sup>5</sup>, PhD; Craig Martens<sup>4</sup>, PhD; Dana P. Scott<sup>2</sup>, DVM; Vincent J. Munster<sup>1</sup>, PhD; Emmie de Wit<sup>1\*</sup>, PhD

<sup>1</sup>Laboratory of Virology, <sup>2</sup>Rocky Mountain Veterinary Branch, <sup>3</sup>Laboratory of Bacteriology and <sup>4</sup>Research Technologies Branch, National Institute of Allergy and Infectious Diseases, National Institutes of Health, Hamilton, MT, United States of America; <sup>5</sup>Gilead Sciences, Foster City, CA, United States of America

**Table S1. Clinical and pathological observations in rhesus macaques inoculated with SARS-CoV-2 and treated with remdesivir.**

| <b>Treatment</b>        | <b>Animal</b> | <b>Clinical observations</b>                                          | <b>Observations at necropsy</b>                                                 |
|-------------------------|---------------|-----------------------------------------------------------------------|---------------------------------------------------------------------------------|
| <b>Remdesivir</b>       | RM1           | Slightly decreased appetite                                           | Mediastinal lymph nodes enlarged                                                |
|                         | RM2           | Slightly decreased appetite                                           | None                                                                            |
|                         | RM3           | Slightly decreased appetite, pale appearance                          | Mediastinal lymph nodes enlarged                                                |
|                         | RM4           | Slightly decreased appetite, slightly dehydrated                      | Mediastinal lymph nodes enlarged                                                |
|                         | RM5           | Slightly decreased appetite                                           | Mediastinal lymph nodes enlarged                                                |
|                         | RM6           | Mild dyspnea, pale appearance                                         | Gross lung lesions; mediastinal lymph nodes enlarged                            |
| <b>Vehicle solution</b> | RM7           | Piloerection, hunched posture, tachypnea, dyspnea, decreased appetite | Gross lung lesions; mediastinal lymph nodes enlarged; focal hemorrhage in colon |
|                         | RM8           | Piloerection, hunched posture, tachypnea, dyspnea, decreased appetite | Gross lung lesions; mediastinal lymph nodes enlarged                            |
|                         | RM9           | Piloerection, hunched posture, tachypnea, dyspnea, decreased appetite | Gross lung lesions; mediastinal lymph nodes enlarged                            |
|                         | RM10          | Tachypnea, dyspnea, pale appearance, slightly dehydrated              | Gross lung lesions; mediastinal lymph nodes enlarged                            |
|                         | RM11          | Piloerection, tachypnea, dyspnea, decreased appetite, pale appearance | Gross lung lesions; mediastinal lymph nodes enlarged                            |
|                         | RM12          | Piloerection, tachypnea, dyspnea, decreased appetite                  | Gross lung lesions; mediastinal lymph nodes enlarged; ~5ml fluid in peritoneum  |

**Table S2. Deep sequencing results to confirm absence of known resistance mutations to remdesivir.**

The timepoints for sequencing of BAL and swab samples were selected based on positivity in qRT-PCR to reflect the latest possible timepoints where the majority of animals were positive for that given sample type in qRT-PCR.

| Treatment  | Animal no.  | Sample                   | Mean sequencing coverage | F476 (nt 14,878-14,880) | V553 (nt 15,109-15,111) |
|------------|-------------|--------------------------|--------------------------|-------------------------|-------------------------|
| Remdesivir | RM1         | BAL <sup>a</sup>         | 197.27                   | no variants             | no variants             |
|            |             | LLLL <sup>b</sup>        | 21.05                    | no variants             | no variants             |
|            |             | Nose swab <sup>c</sup>   | 138.89                   | no variants             | no variants             |
|            |             | RLLL <sup>d</sup>        | 11.22                    | no variants             | no variants             |
|            | RM2         | BAL                      | 21.7                     | no variants             | no variants             |
|            |             | LLLL                     | 32.65                    | no variants             | no variants             |
|            |             | Nose swab                | 187.29                   | no variants             | no variants             |
|            |             | RLLL                     | 19.37                    | no variants             | no variants             |
|            | RM3         | BAL                      | 4.76                     | ND <sup>f</sup>         | ND                      |
|            |             | LLLL                     | 5.43                     | ND                      | ND                      |
|            |             | Nose swab                | 49.11                    | no variants             | no variants             |
|            |             | RLLL                     | 2.08                     | no variants             | ND                      |
|            |             | Rectal swab <sup>e</sup> | 35.47                    | no variants             | no variants             |
|            | RM4         | BAL                      | 421.43                   | no variants             | no variants             |
|            |             | LLLL                     | 81.65                    | no variants             | no variants             |
|            |             | Nose swab                | 31.97                    | no variants             | no variants             |
|            |             | RLLL                     | 0.05                     | ND                      | ND                      |
|            | RM5         | Rectal swab              | 0.56                     | ND                      | ND                      |
|            |             | BAL                      | 25.37                    | no variants             | no variants             |
|            |             | LLLL                     | 0.02                     | ND                      | ND                      |
|            | RM6         | Nose swab                | 25.13                    | no variants             | no variants             |
|            |             | RLLL                     | 0.31                     | ND                      | ND                      |
|            |             | BAL                      | 17.1                     | no variants             | no variants             |
|            |             | LLLL                     | 5.39                     | no variants             | ND                      |
| Vehicle    | RM7         | Nose swab                | 25.27                    | ND                      | no variants             |
|            |             | RLLL                     | 1.25                     | ND                      | no variants             |
|            |             | Rectal swab              | 0.42                     | ND                      | ND                      |
|            |             | BAL                      | 352.51                   | no variants             | no variants             |
|            |             | LLLL                     | 123.92                   | no variants             | no variants             |
| RM8        | Nose swab   | 1.11                     | ND                       | no variants             |                         |
|            | RLLL        | 229.79                   | no variants              | no variants             |                         |
|            | Rectal swab | 17.72                    | no variants              | no variants             |                         |
|            | BAL         | 80.01                    | no variants              | no variants             |                         |
|            | LLLL        | 16.3                     | no variants              | no variants             |                         |
| RM8        | Nose swab   | 0                        | ND                       | ND                      |                         |
|            | RLLL        | 4.28                     | ND                       | ND                      |                         |
|            | Rectal swab | 1.39                     | ND                       | no variants             |                         |

|      |             |         |             |             |
|------|-------------|---------|-------------|-------------|
| RM9  | BAL         | 258.39  | no variants | no variants |
|      | LLLL        | 1.34    | ND          | no variants |
|      | Nose swab   | 0.87    | ND          | ND          |
|      | RLLL        | 26.65   | no variants | no variants |
| RM10 | BAL         | 250.71  | no variants | no variants |
|      | LLLL        | 7.12    | no variants | no variants |
|      | Nose swab   | 0.2     | ND          | ND          |
|      | RLLL        | 1210.31 | no variants | no variants |
| RM11 | Rectal swab | 5.17    | ND          | no variants |
|      | BAL         | 880.97  | no variants | no variants |
|      | LLLL        | 56.38   | no variants | no variants |
|      | Nose swab   | 2.63    | ND          | ND          |
| RM12 | RLLL        | 597.65  | no variants | no variants |
|      | Rectal swab | 0.1     | ND          | ND          |
|      | BAL         | 415.3   | no variants | no variants |
|      | LLLL        | 0.43    | ND          | ND          |
|      | Nose swab   | 20.44   | no variants | no variants |
|      | RLLL        | 88.08   | no variants | no variants |
|      | Rectal swab | 11.56   | ND          | no variants |

<sup>a</sup> BAL: bronchoalveolar lavages collected at 3 dpi.

<sup>b</sup> LLLL: left lower lung lobe collected on 7 dpi

<sup>c</sup> collected on 5 dpi

<sup>d</sup> RLLL: right lower lung lobe collected on 7 dpi

<sup>e</sup> collected on 2 dpi

<sup>f</sup> No sequence coverage or coverage was too limited to call

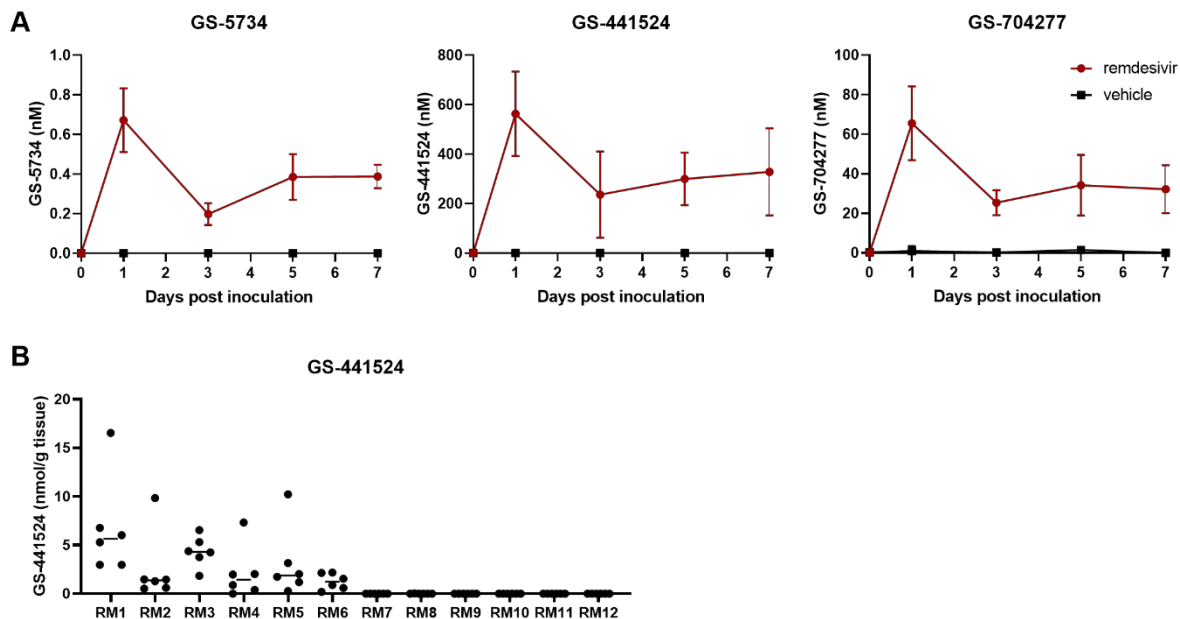

**Figure S1. Concentration of remdesivir prodrug and metabolites measured in serum and lung homogenates of rhesus macaques infected with SARS-CoV-2.** Two groups of six rhesus macaques were inoculated with SARS-CoV-2 strain nCoV-WA1-2020. Twelve hours post inoculation, one group was administered 10mg/kg intravenous remdesivir and the other group was treated with an equal volume of vehicle solution (2ml/kg). Treatment was continued 12hrs after the first treatment, and every 24 hrs thereafter with a dose of 5 mg/kg remdesivir or equal volume of vehicle solution (1ml/kg). Panel A shows the serum concentration of remdesivir prodrug GS-5734, the dephosphorylated nucleoside product GS-441524 and the intermediate alanine metabolite GS-704277 over time as measured in by LCMS. Mean and standard deviation are shown. Panel B shows the concentration of GS-441524 homogenized lung tissue collected from all six lung lobes on 7 dpi, 24 hrs after the last remdesivir treatment was administered. Each dot represents the concentration of GS-441524 in one lung lobe.
